# Supplementary material for: Perspectives on Glucocorticoid treatment of COVID-19: a systematic review
Source: Research Square preprint supplement (doi:10.21203/rs.3.rs-103178/v1), 2020-11-06
Supplement: Supplementary file 1 [file 6602efde0bbc3bbbc6458d09.xlsm]

## Sheet: Intro
	Instructions for the assessment form					Instructions for the summary					Instructions for the figure					Instructions for generating a print view					Instructions for the discrepancy check

## Sheet: Baseline 1
Study ID	Country	Site	NOS/Jaded score	Age (I vs C)	N (used GC vs didn't use GC)	Gender Male/Total (I vs C)	Coluna10	Coluna1	Coluna2	Coluna3	Coluna4	Coluna5	Coluna6	Coluna7	Coluna8	Coluna9
Guan	China	Multi-center	5	Severe: 52.0 (40.0–65.0) Nonsevere: 45.0 (34.0–57.0)	204; 895	Severe: 100/173 Nonsevere: 537/923
Yang	China	Single center	6	Survivors: 51·9 (12·9) Nonsurvivors: 64·6 (11·2)	30; 22	Survivors: 14/20 Nonsurvivors: 21/32
Zhou	China	Two centers	6	Survivors: 52·0 (45·0–58·0) Nonsurvivors: 69·0 (63·0–76·0)	57; 134	Survivors: 81/137 Nonsurvivors: 38/54
Cao	China	Single center	6	Survivors: 53 (47-66) Nonsurvivors: 72 (63-81)	51; 51	Survivors: 40/85 Nonsurvivors: 13/17
Salacup	USA	Single center	6	Survivors: 64.08±15.07 Nonsurvivors: 73.15±11.01	55; 187	Survivors: 96/190 Nonsurvivors: 27/52
Li	China	Single center	6	Survivors: 62 (53-70) Nonsurvivors: 71 (69-77)	70; 4	Survivors: 33/60 Nonsurvivors: 11/14
Zha	China	Two centers	8	Corticosteroid: 53 (36–57) Noncorticosteroid: 37 (27–52)	11; 20	Corticosteroid: 8/11 Noncorticosteroid: 12/20
Wang	China	Single center	8	Corticosteroid: 54(48,63) Noncorticosteroid: 53(48,63)	26; 20	Corticosteroid: 16/26 Noncorticosteroid: 10/20
Gong	China	Single center	4	Corticosteroid: 38.22 ± 8.95 Noncorticosteroid: 33.75 ± 7.80	18; 16	Corticosteroid: 11/18 Noncorticosteroid: 11/16
Cruz	Spain	Single center	7	Corticosteroid: 65.4 (12.9) Noncorticosteroid: 68.1 (15.7)	396; 67	Corticosteroid: 276/396 Noncorticosteroid: 41/67
Fang	China	Single center	7	Corticosteroid: General group - 40.2±12.6. Severe Group - 60.6±13.6 Noncorticosteroid: General group - 39.9±15.5. Severe group - 54.3±15.4	25; 53	Corticosteroid: General group - 5/9. Severe Group - 12/16 Noncorticosteroid: General group - 22/46. Severe group - 5/7
Wu	China	Single center	6	Without ARDS: 48.0 (40.0 to 54.0) With ARDS: 58.5 (50.0 to 69.0)	62; 139	Without ARDS: 68/117 With ARDS: 60/84
Shang	China	Multi-center	6	Survivors: Common - 46·0(33·0~56·0). Severe - 50·0(38·0~60·0) Death: 67·0(61·0~77·0)	196; 220	Survivors: Common - 89/226. Severe - 77/139 Death: 31/51
Xu	China	Two centers	6	<15 days to viral clearance: 48 (34, 61) >15 days to viral clearance: 54,5 (45, 63)	64/49	<15 days to viral clearance: 15/37 >15 days to viral clearance: 51/76

## Sheet: Baseline 2
Study ID	Severity of disease	Type, dose and duration	Outcome	Result	Coluna1	Coluna2	Coluna3	Coluna4	Coluna5	Coluna6	Coluna7	Coluna8	Coluna9	Coluna10	Coluna11	Coluna12
Guan	Severe/ Nonsevere	Systemic glucocorticoids	Admission to an (ICU), the use of mechanical ventilation, or death	Higher percentage among those without outcome
Yang	Critically ill	Glucocorticoids	28-day mortality after ICU admission	Higher percentage among those without outcome
Zhou	All	Corticosteroids	Mortality	Higher percentage among those with outcome with statistical difference
Cao	All	Methylprednisolone Sodium Succ	Mortality	Higher percentage among those with outcome but no statistical difference
Salacup	All	Steroids	Mortality	Higher percentage among those with outcome with statistical difference
Li	Severe and critical	Corticosteroids	Mortality	Higher percentage among those without outcome but no statistical difference
Zha	Mild	40 mg Methylprednisolone once or twice per day within 24 hours of admission for a median 5 days	Time to virus clearance	No statistically significant differences in virologic or clinical outcomes between patients who received and those who did not receive corticosteroid
Wang	Severe	Methylprednisolone treatment with the dosage of 12mg/kg/d for 5-7 days	Clinical, laboratory and radiological improvement	Better statistically significant improvement among those who received methylprednisolone in duration of fever, Sp02 and absorption degree of the focus in chest CT
Gong	All	Methylprednisolone as 1-2mg/kg/d in the initial dose and gradually halved every 3 days, total treating course range from 5 to 10 days	Viral genomic nucleic acid negative conversion and CT imaging lesion absorption	No statistical difference in the CT imaging lesion absorption in both 2 groups but shorter time needed to viral genomic nucleic acid negative conversion in the methylprednisolone group
Cruz	COVID-19 patients complicated with ARDS and/or an hyperinflammatory syndrome	1 mg/kg/day Methylprednisolone or equivalent, and steroid pulse	In-hospital mortality	In-hospital mortality was lower in patients treated with steroids than in controls
Fang	General and severe	Oral methylprednisolone, 237.5 mg/day for a median duration of 7 days in the general group. Intravenous methylprednisolone, 250.0 mg/day for a median duration of 4.5 days in the severe group	Time to virus clearance	No significant difference identified in both patients in the general group and patients in the severe group
Wu	All	Methylprednisolone	Development of ARDS and death among those with ARDS	Patients who developed ARDS were more likely to be treated with methylprednisolone and the administration of methylprednisolone appears to have reduced the risk of death in patients with ARDS
Shang	All	methylprednisolone, prednisone acetate, and dexamethasone	Hospitalization time and clinical and laboratory changing	Survivors who received corticosteroid therapy had a longer duration of hospitalization and there was a significant recovery of lymphocyte counts after corticosteroids therapy for the survivors but not the deaths.
Xu	All	Corticosteroids	Time to virus clearance	Higher percentage among the > 15 days to virus clearence group with statistical difference

## Sheet: Figures
Studies with intention-to-treat	Unique ID	Study ID	Experimental	Comparator	Outcome	Weight	Randomization process	Deviations from intended interventions	Missing outcome data	Measurement of the outcome	Selection of the reported result	Overall					Studies with pre-protocol	Unique ID	Study ID	Experimental	Comparator	Outcome	Weight	Randomization process	Deviations from intended interventions	Missing outcome data	Measurement of the outcome	Selection of the reported result	Overall

## Sheet: Print_format (PP)
Unique ID		Study ID		Assessor
Ref or Label		Aim	adhering to intervention (the 'per-protocol' effect)	The effect of adhering to intervention…
Experimental		Comparator		Source
Outcome		Results		Weight
Domain	Signalling question			Response	Comments
Bias arising from the randomization process	1.1 Was the allocation sequence random?
	1.2 Was the allocation sequence concealed until participants were enrolled and assigned to interventions?
	1.3 Did baseline differences between intervention groups suggest a problem with the randomization process?
	Risk of bias judgement
Bias due to deviations from intended interventions	2.1 Were participants aware of their assigned intervention during the trial?
	2.2 Were carers and people delivering the interventions aware of participants' assigned intervention during the trial?
	2.3. [If applicable:] If Y/PY/NI to 2.1 or 2.2: Were important non-protocol interventions balanced across intervention groups?
	2.4. [If applicable:] Were there failures in implementing the intervention that could have affected the outcome?
	2.5. [If applicable:] Was there non-adherence to the assigned intervention regimen that could have affected participants’ outcomes?
	2.6. If N/PN/NI to 2.3, or Y/PY/NI to 2.4 or 2.5: Was an appropriate analysis used to estimate the effect of adhering to the intervention?
	Risk of bias judgement
Bias due to missing outcome data	3.1 Were data for this outcome available for all, or nearly all, participants randomized?
	3.2 If N/PN/NI to 3.1: Is there evidence that result was not biased by missing outcome data?
	3.3 If N/PN to 3.2: Could missingness in the outcome depend on its true value?
	3.4 If Y/PY/NI to 3.3: Is it likely that missingness in the outcome depended on its true value?
	Risk of bias judgement
Bias in measurement of the outcome	4.1 Was the method of measuring the outcome inappropriate?
	4.2 Could measurement or ascertainment of the outcome have differed between intervention groups?
	4.3 Were outcome assessors aware of the intervention received by study participants?
	4.4 If Y/PY/NI to 4.3: Could assessment of the outcome have been influenced by knowledge of intervention received?
	4.5 If Y/PY/NI to 4.4: Is it likely that assessment of the outcome was influenced by knowledge of intervention received?
	Risk of bias judgement
Bias in selection of the reported result	5.1 Were the data that produced this result analysed in accordance with a pre-specified analysis plan that was finalized before unblinded outcome data were available for analysis?
	5.2 ... multiple eligible outcome measurements (e.g. scales, definitions, time points) within the outcome domain?
	5.3 ... multiple eligible analyses of the data?
	Risk of bias judgement
Overall bias	Risk of bias judgement

## Sheet: Print_format (ITT)
Unique ID		Study ID		Assessor
Ref or Label		Aim	assignment to intervention (the 'intention-to-treat' effect)
Experimental		Comparator		Source
Outcome		Results		Weight
Domain	Signalling question			Response	Comments
Bias arising from the randomization process	1.1 Was the allocation sequence random?
	1.2 Was the allocation sequence concealed until participants were enrolled and assigned to interventions?
	1.3 Did baseline differences between intervention groups suggest a problem with the randomization process?
	Risk of bias judgement
Bias due to deviations from intended interventions	2.1.Were participants aware of their assigned intervention during the trial?
	2.2.Were carers and people delivering the interventions aware of participants' assigned intervention during the trial?
	2.3. If Y/PY/NI to 2.1 or 2.2: Were there deviations from the intended intervention that arose because of the experimental context?
	2.4 If Y/PY to 2.3: Were these deviations likely to have affected the outcome?
	2.5. If Y/PY/NI to 2.4: Were these deviations from intended intervention balanced between groups?
	2.6 Was an appropriate analysis used to estimate the effect of assignment to intervention?
	2.7 If N/PN/NI to 2.6: Was there potential for a substantial impact (on the result) of the failure to analyse participants in the group to which they were randomized?
	Risk of bias judgement
Bias due to missing outcome data	3.1 Were data for this outcome available for all, or nearly all, participants randomized?
	3.2 If N/PN/NI to 3.1: Is there evidence that result was not biased by missing outcome data?
	3.3 If N/PN to 3.2: Could missingness in the outcome depend on its true value?
	3.4 If Y/PY/NI to 3.3: Is it likely that missingness in the outcome depended on its true value?
	Risk of bias judgement
Bias in measurement of the outcome	4.1 Was the method of measuring the outcome inappropriate?
	4.2 Could measurement or ascertainment of the outcome have differed between intervention groups?
	4.3 Were outcome assessors aware of the intervention received by study participants?
	4.4 If Y/PY/NI to 4.3: Could assessment of the outcome have been influenced by knowledge of intervention received?
	4.5 If Y/PY/NI to 4.4: Is it likely that assessment of the outcome was influenced by knowledge of intervention received?
	Risk of bias judgement
Bias in selection of the reported result	5.1 Were the data that produced this result analysed in accordance with a pre-specified analysis plan that was finalized before unblinded outcome data were available for analysis?
	5.2 ... multiple eligible outcome measurements (e.g. scales, definitions, time points) within the outcome domain?
	5.3 ... multiple eligible analyses of the data?
	Risk of bias judgement
Overall bias	Risk of bias judgement

## Sheet: Function Tab
	Journal article(s) with results of the trial	NA	Yes		1.1 Was the allocation sequence random?		2.1 Were participants aware of their assigned intervention during the trial?	2.1 Were participants aware of their assigned intervention during the trial?		3.1 Were data for this outcome available for all, or nearly all, participants randomized?	Individually Randomized, Parallel Group Trials	4.1 Was the method of measuring the outcome inappropriate?	assignment to intervention (the 'intention-to-treat' effect)	5.1 Were the data that produced this result analysed in accordance with a pre-specified analysis plan that was finalized before unblinded outcome data were available for analysis?				occurance of non-protocol interventions
NA	Trial protocol	Favours experimental	No (Please include reasons in the note)	Y	1.2 Was the allocation sequence concealed until participants were enrolled and assigned to interventions?	Low	2.2 Were carers and people delivering the interventions aware of participants' assigned intervention during the trial?	2.2 Were carers and people delivering the interventions aware of participants' assigned intervention during the trial?		3.2 If N/PN/NI to 3.1: Is there evidence that the result was not biased by missing outcome data?		4.2 Could measurement or ascertainment of the outcome have differed between intervention groups?	adhering to intervention (the 'per-protocol' effect)	5.2 ... multiple eligible outcome measurements (e.g. scales, definitions, time points) within the outcome domain?				failures in implementing the intervention that could have affected the outcome
Y	Statistical analysis plan (SAP)	Favours comparator		PY	1.3 Did baseline differences between intervention groups suggest a problem with the randomization process?	High	2.3 [if applicable:] If Y/PY/NI to 2.1 or 2.2: Were important non- protocol interventions balanced across intervention groups?	2.3 If Y/PY/NI to 2.1 or 2.2: Were there deviations from the intended intervention that arose because of the experimental context?		3.3 If N/PN to 3.2: Could missingness in the outcome depend on its true value?		4.3 If N/PN/NI to 4.1 and 4.2: Were outcome assessors aware of the intervention received by study participants?		5.3 ... multiple eligible analyses of the data?				non-adherence to their assigned intervention by trial participants
PY	Non-commercial trial registry record (e.g. ClinicalTrials.gov record)	Towards null		PN		Some concerns	2.4 [if applicable:] Were there failures in implementing the intervention that could have affected the outcome?	2.4 If Y/PY to 2.3: Were these deviations likely to have affected the outcome?		3.4 If Y/PY/NI to 3.3: Is it likely that missingness in the outcome depended on its true value?		4.4 If Y/PY/NI to 4.3: Could assessment of the outcome have been influenced by knowledge of intervention received?
PN	Company-owned trial registry record (e.g. GSK Clinical Study Register record)	Away from null		N			2.5 [if applicable:] Was there non-adherence to the assigned intervention regimen that could have affected participants’ outcomes?	2.5. If Y/PY/NI to 2.4: Were these deviations from intended intervention balanced between groups?				4.5 If Y/PY/NI to 4.4: Is it likely that assessment of the outcome was influenced by knowledge of intervention received?
N	“Grey literature” (e.g. unpublished thesis)	Unpredictable		NI			2.6 If N/PN/NI to 2.3, or Y/PY/NI to 2.4 or 2.5: Was an appropriate analysis used to estimate the effect of adhering to the intervention?	2.6 Was an appropriate analysis used to estimate the effect of assignment to intervention?
NI	Conference abstract(s) about the trial							2.7 If N/PN/NI to 2.6: Was there potential for a substantial impact (on the result) of the failure to analyse participants in the group to which they were randomized?
	Regulatory document (e.g. Clinical Study Report, Drug Approval Package)
	Research ethics application
	Grant database summary (e.g. NIH RePORTER, UKRI Gateway to Research)
	Personal communication with trialist
	Personal communication with the sponsor
